# Supplementary material
Source: PubMed Central journal article supplement (PMC5788414)

# Supporting Information

## Discovery of a Small-Molecule Degradator of Bromodomain and Extra-Terminal (BET) Proteins with Picomolar Cellular Potencies and Capable of Achieving Tumor Regression

Bing Zhou,<sup>1,2^</sup> Jiantao Hu,<sup>1,2^</sup> Fuming Xu,<sup>1,2^</sup> Zhuo Chen,<sup>1,2^</sup> Longchuan Bai,<sup>1,2^</sup>  
Ester Fernandez-Salas,<sup>1,3^ 1,2^</sup> Mei Lin,<sup>1,2^</sup> Liu Liu,<sup>1,2</sup> Chao-Yie Yang,<sup>1,2</sup> Yujun  
Zhao,<sup>1,2</sup> Donna McEachern,<sup>1,2</sup> Sally Przybranowski,<sup>1,2</sup> Bo Wen,<sup>1,4</sup> Duxin Sun,<sup>1,4</sup> and  
Shaomeng Wang,<sup>1,2,5,6\*</sup>

<sup>1</sup>University of Michigan Comprehensive Cancer Center, Departments of <sup>2</sup>Internal  
Medicine, <sup>3</sup>Pathology, <sup>4</sup>Pharmaceutical Sciences, <sup>5</sup>Medicinal Chemistry, and  
<sup>6</sup>Pharmacology, University of Michigan, Ann Arbor, Michigan 48109, USA

### Contents of Supporting Information:

**Figure S1.** Western blotting analysis of BRD2, BRD3 and BRD4 proteins in RS4;11 cells treated with compounds **8**, **23** and **26**.

**Figure S2.** <sup>1</sup>H NMR spectrum for compound **23**.

**Figure S3.** <sup>13</sup>C NMR spectrum for compound **23**.

**Figure S4.** UPLC-MS results for compound **23**.

**Figure S5.** Metabolism of compound **23** in mouse liver microsomes.

**Figure S1.** Western blotting analysis of BRD2, BRD3 and BRD4 proteins in RS4;11 cells treated with BET degraders **23** and **26** and BET inhibitor **8**. RS4;11 cells were treated for 3 h with individual compound at indicated concentrations and proteins were probed by specific antibodies. GAPDH was used as the loading control.

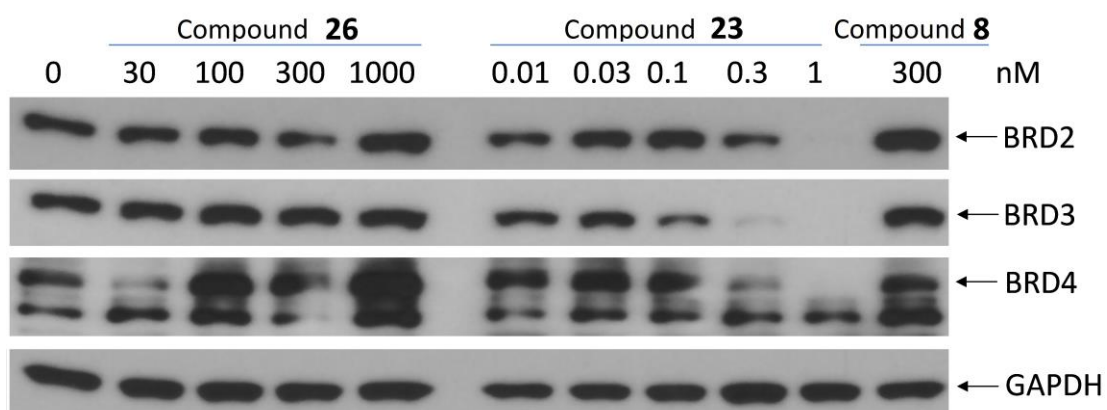

Figure S2. <sup>1</sup>H NMR of 23.

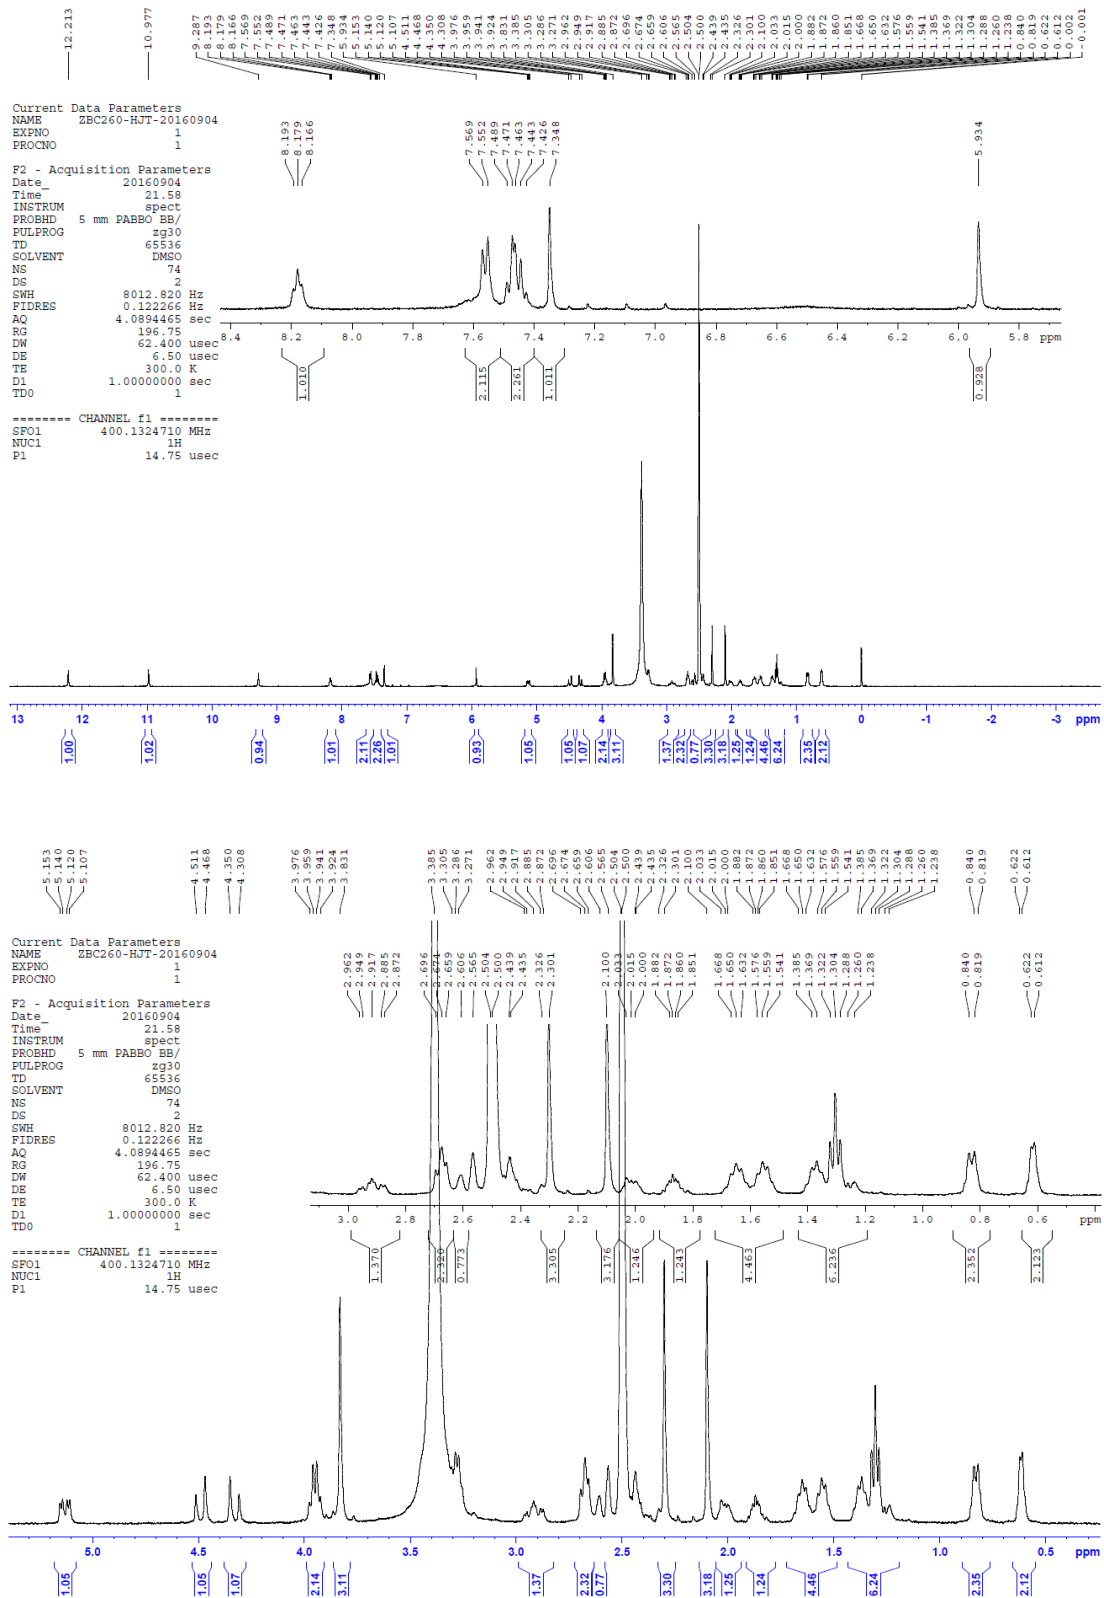

Figure S3.  $^{13}\text{C}$  NMR spectrum of compound **23**.

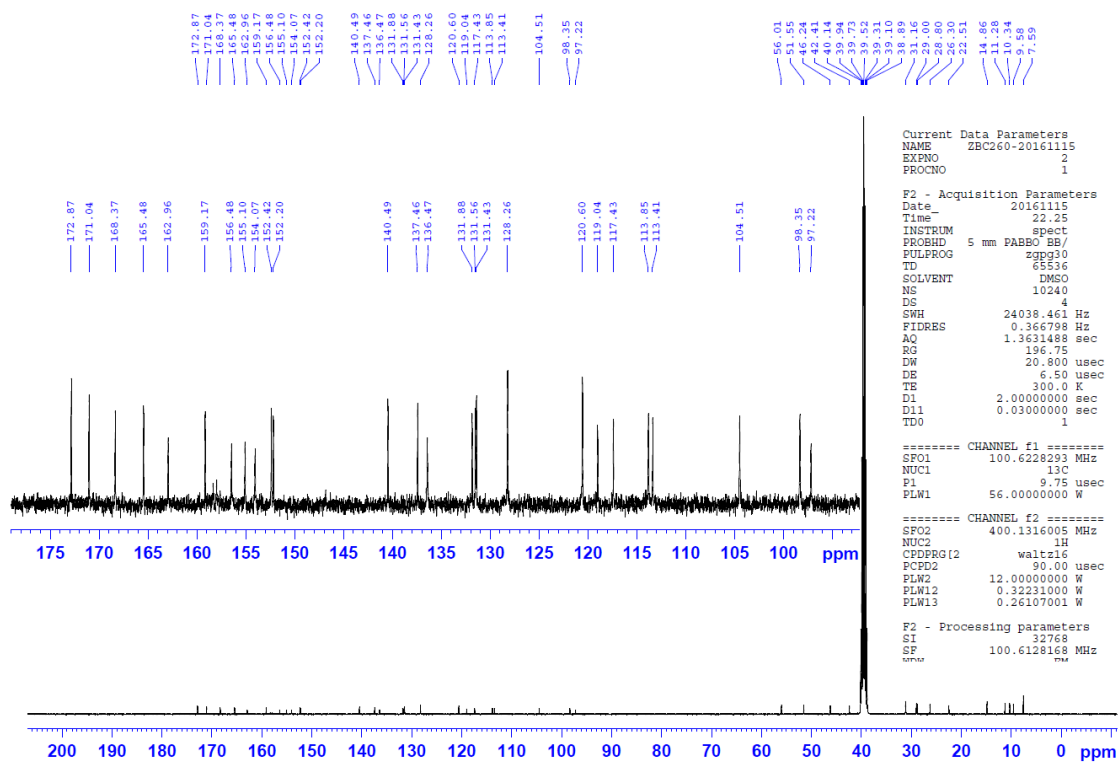

**Figure S4.** UPLC-MS results for compound **23**.

| SAMPLE INFORMATION |               |                     |                          |
|--------------------|---------------|---------------------|--------------------------|
| Sample Name:       | HJT-A251-HPLC | Acquired By:        | System                   |
| Sample Type:       | Unknown       | Date Acquired:      | 3/16/2016 6:19:33 PM EDT |
| Vial:              | 1:B,6         | Acq. Method Set:    | 10to100% Bin 10          |
| Injection #:       | 1             | Date Processed:     | 3/16/2016 10:18 PM EDT   |
| Injection Volume:  | 3.00 ul       | Processing Method:  | Caffeine PDA             |
| Run Time:          | 10.0 Minutes  | Channel Name:       | 254.0nm@2                |
| Sample Set Name:   | 2             | Proc. Chnl. Descr.: | PDA Spectrum (210-500)nm |

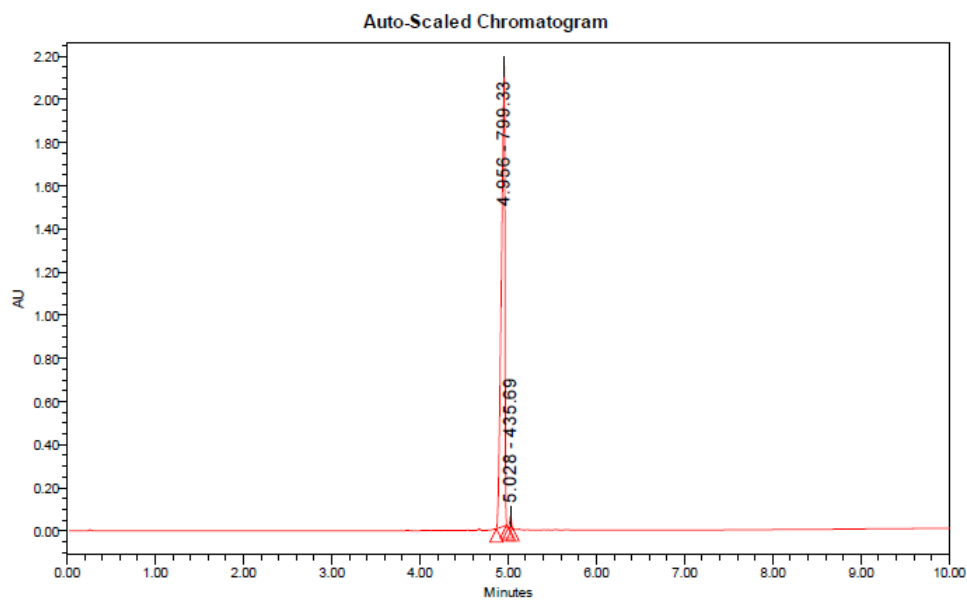

**Peak Results**

|   | RT    | Area    | Height  | % Area |
|---|-------|---------|---------|--------|
| 1 | 4.956 | 5872907 | 2133708 | 98.85  |
| 2 | 5.028 | 68087   | 53990   | 1.15   |

**Peak Results**

|   | Base Peak (m/z) |
|---|-----------------|
| 1 | 799.33          |
| 2 | 435.69          |

**Figure S5.** Proposed metabolites of compound **23** in mouse liver microsomes

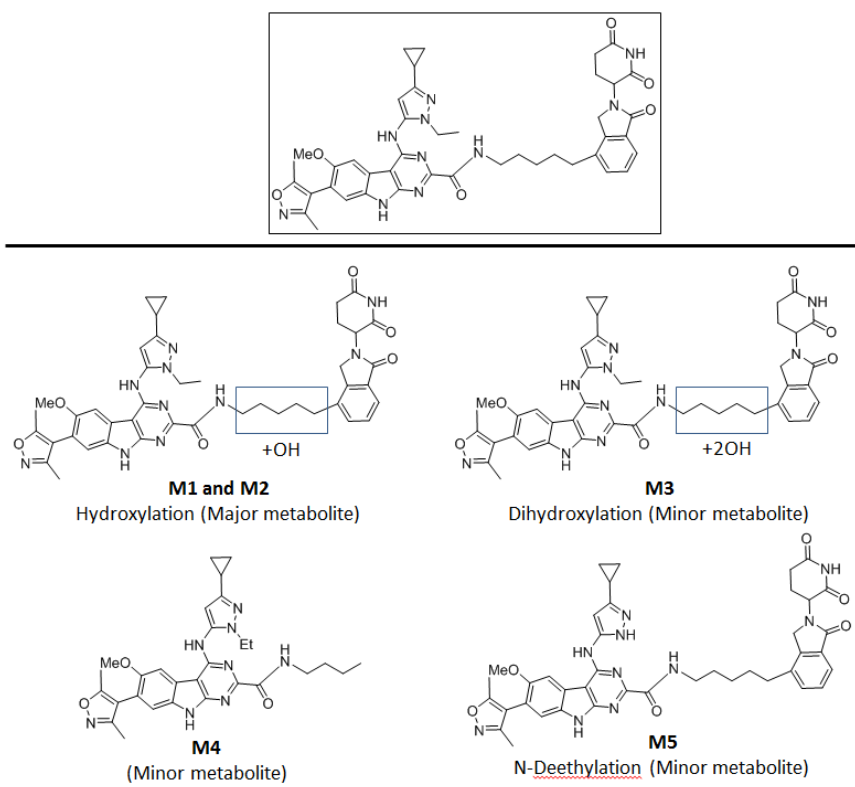

Supplement: jm6b01816_si_001.pdf [file jm6b01816_si_001.pdf]
